# Supplementary material
Source: Royal Society of Chemistry journal article supplement (doi:10.1039/d6qm00260a)
Supplement: d6qm00260a1.pdf [file d6qm00260a1.pdf]

## **Photothermal-responsive nanocomposite hydrogel for intelligent drug release and alveolar bone regeneration**

Junjie Wang<sup>1, 2, #</sup>, Haojie Chen<sup>2, #</sup>, Dai Wang<sup>2, #</sup>, Jianzhao Chen<sup>2</sup>, Liujia Lan<sup>3</sup>, Wenqiang Li<sup>4, \*</sup>, Shan Shen<sup>1, 2, \*</sup>

<sup>1</sup>Hospital of Stomatology, The First Affiliated Hospital of Jinan University, Guangzhou 510630, China.

<sup>2</sup>School of Stomatology, Jinan University, Guangzhou 510632, China.

<sup>3</sup>Guangdong Huayi Biomedical Science and Technology Center, Guangzhou 511450, China.

<sup>4</sup>Guangdong Traditional Medical and Sports Injury Rehabilitation Research Institute, The Affiliated Guangdong Second Provincial General Hospital of Jinan University, Guangzhou 510317, China.

#These authors contributed equally to this work.

\*Corresponding author.

E-mail: [liwq@gzsport.edu.cn](mailto:liwq@gzsport.edu.cn), [405119923@qq.com](mailto:405119923@qq.com) (WQ. Li), [tshensh@jnu.edu.cn](mailto:tshensh@jnu.edu.cn) (S. Shen)

## Result section

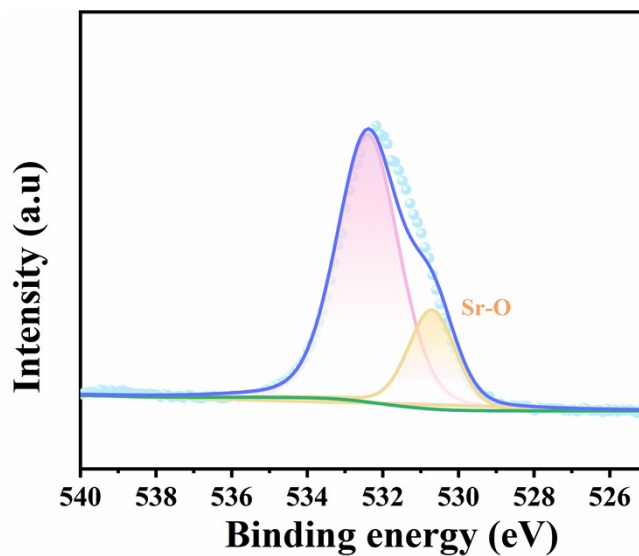

Fig. S1. Fine XPS spectrum of O 1s.

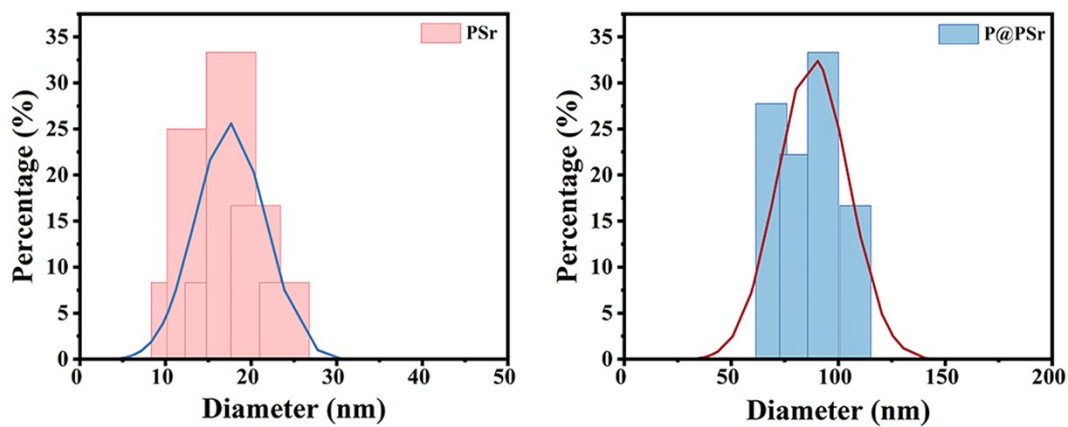

Fig. S2. Particle size distribution of PSr and P@PSr.

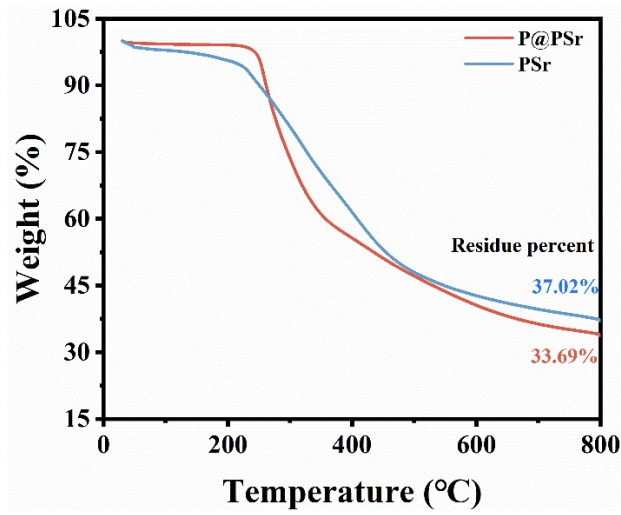

Fig. S3. Thermogravimetric curves of PSr and P@PSr.

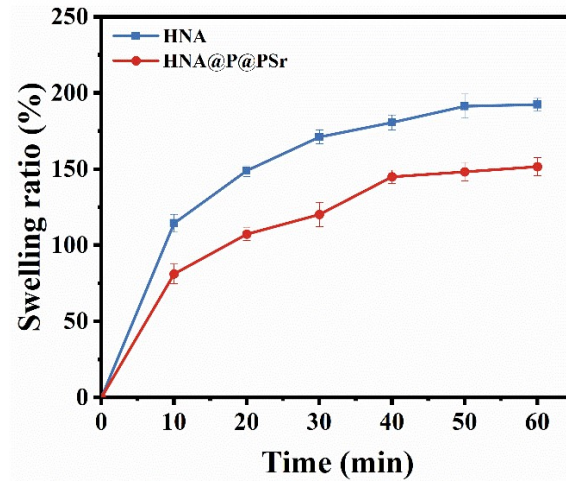

Fig. S4. The swelling behavior of HNA@P@PSr.

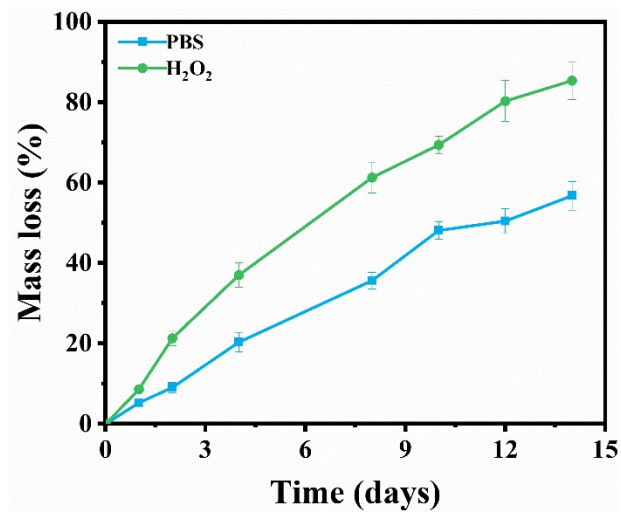

Fig. S5. The degradation of HNA@P@PSr over 14 days.

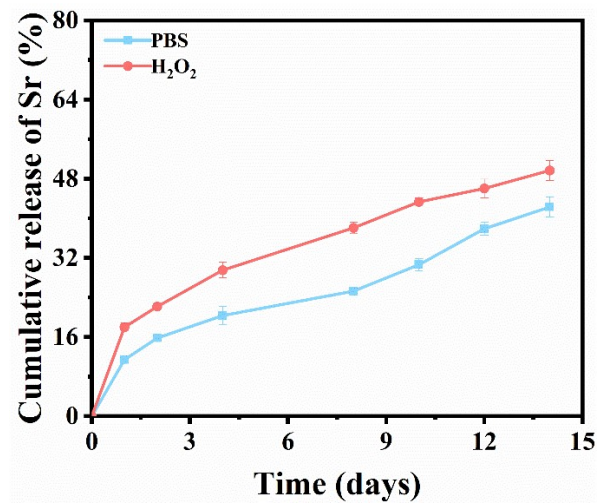

Fig. S6. Sr release profile of HNA@P@PSr at NIR irradiation on PBS or H<sub>2</sub>O<sub>2</sub>.

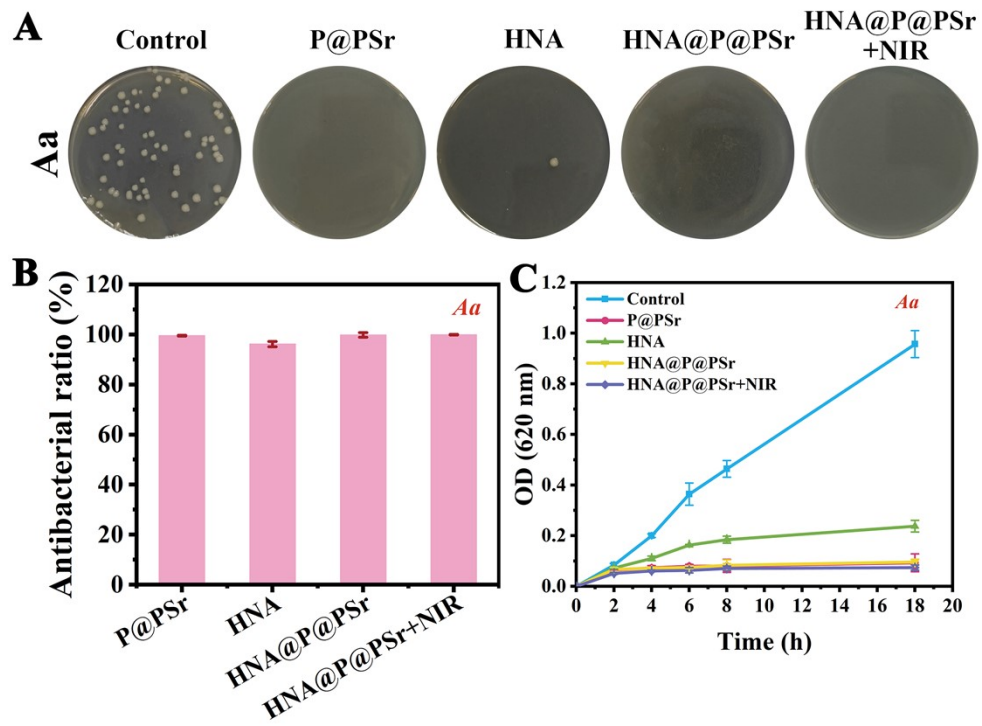

Fig. S7. A. Images of aggregatibacter actinomycetemcomitans (*Aa*) colonies. B. Absorbance value of bacterial suspension. C. Quantitative analysis of bacterial survival ratio.

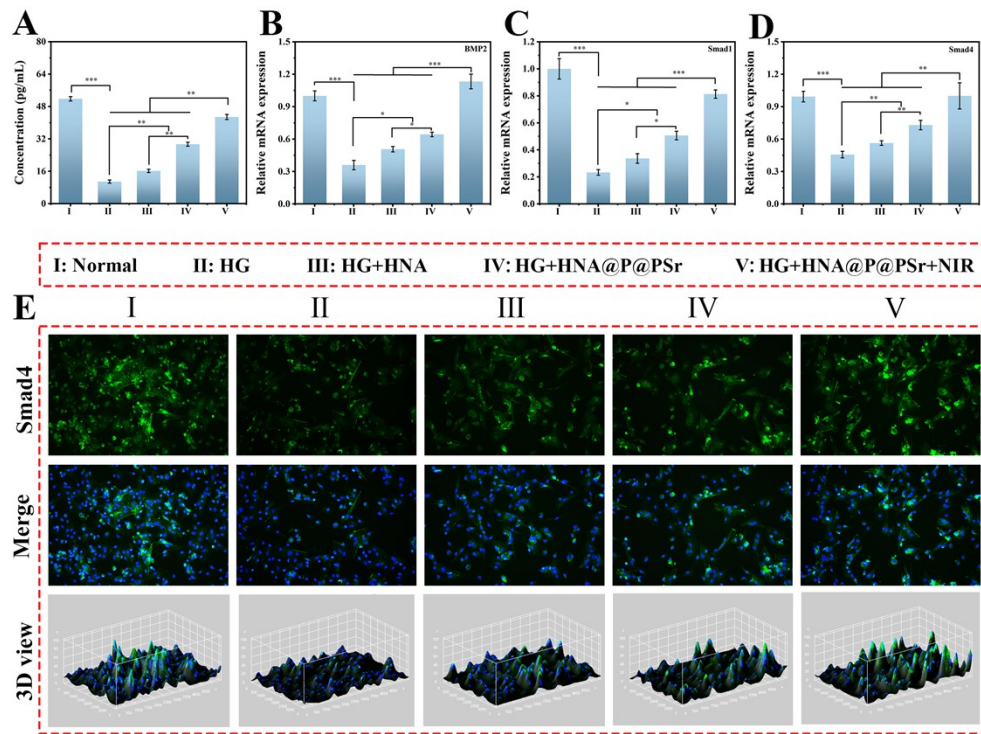

Fig. S8. A. BMP2 content in the cell supernatant. B-D. BMP2, Smad1 and Smad4 mRNA content. E. IF staining for Smad4.
